RESEARCH ARTICLE

# Prevalence, correlates, and mental and physical health burden of cardiovascular disease in older U.S. military veterans

Cailin G. Arechiga<sup>1</sup>, Rick Yang<sup>2</sup>, Robert H. Pietrzak<sup>1,3,4\*</sup>

**1** Department of Social and Behavioral Sciences, Yale School of Public Health, New Haven, Connecticut, United States of America, **2** Department of Psychology, Harvard University, Cambridge, Massachusetts, United States of America, **3** U.S. Department of Veterans Affairs National Center for PTSD, VA Connecticut Healthcare System, West Haven, Connecticut, United States of America, **4** Department of Psychiatry, Yale School of Medicine, New Haven, Connecticut, United States of America

\* [robert.pietrzak@yale.edu](mailto:robert.pietrzak@yale.edu)

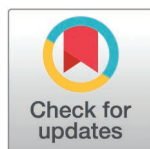

## Abstract

Cardiovascular disease (CVD) is one of the leading causes of death in the U.S. and is associated with a range of demographic, military, trauma, and clinical characteristics, as well as physical and mental health conditions. Older military veterans may have an increased risk of CVD due to their advanced age and military experiences. To date, however, the prevalence and health burden of CVD in population-based samples of veterans has not been well characterized. This study aimed to characterize the current prevalence of CVD and its association with sociodemographic, military, trauma, and clinical variables in a large, contemporary, and nationally representative sample of older U.S. veterans. Data were analyzed from a cross-sectional sample of 3,001 older U.S. military veterans (aged 60 and older) who participated in the National Health and Resilience in Veterans Study (NHRVS). Veterans were classified according to lifetime CVD status (CVD or no CVD, i.e., diagnoses by a healthcare professional of heart disease, heart attack, and/or stroke). To determine the association of CVD with health status, a comprehensive range of mental and physical health variables was assessed using validated self-report assessments. A total of 25.5% of veterans reported having been diagnosed with CVD. Greater age, cumulative trauma burden, nicotine use disorder, and diagnoses of hypertension, high cholesterol, and diabetes were associated with CVD. CVD was independently associated with a range of mental (odds ratios [ORs] = 1.53–2.27) and physical (ORs = 1.53–3.43) health conditions. Collectively, the results of this study suggest that one in four older U.S. veterans has report being diagnosed with CVD in their lifetimes. Given the broad range of physical and mental health conditions associated with CVD, these findings highlight the importance of integrated and multimodal prevention and intervention efforts for this population.

## OPEN ACCESS

**Citation:** Arechiga CG, Yang R, Pietrzak RH (2024) Prevalence, correlates, and mental and physical health burden of cardiovascular disease in older U.S. military veterans. *PLOS Ment Health* 1(7): e0000192. <https://doi.org/10.1371/journal.pmen.0000192>

**Editor:** Shishir Paudel, CiST College, Pokhara University, NEPAL

**Received:** August 5, 2024

**Accepted:** November 6, 2024

**Published:** December 18, 2024

**Copyright:** This is an open access article, free of all copyright, and may be freely reproduced, distributed, transmitted, modified, built upon, or otherwise used by anyone for any lawful purpose. The work is made available under the [Creative Commons CC0](https://creativecommons.org/licenses/by/4.0/) public domain dedication.

**Data availability statement:** A minimal data set was uploaded with this submission.

**Funding:** The authors received no specific funding for this work.

**Competing interests:** The authors have declared that no competing interests exist.

## 1. Introduction

Epidemiologic studies consistently identify advanced age as a significant risk factor for cardiovascular disease (CVD). The American Heart Association's recent update shows that 28.2% of men aged 60–79 and 39.6% of those aged 80 and older have heart disease, while the rates for women are 19.6% and 32.8%, respectively [1]. U.S. veterans, who are on average 20 years older than non-veterans, may face increased CVD risk; yet, nationally representative data on CVD prevalence in this group are scarce.

The long-term effects of military service can impact both physical and mental health, potentially heightening CVD risk among older veterans [2–6]. For instance, one conceptual model suggests that military service, especially combat exposure, acts as a “hidden variable in aging men,” negatively influencing the aging process through trauma exposure, injury severity, and related stressors [6]. A study involving over 150,000 participants from the National Health Interview Study revealed that younger veterans (ages 25–70) reported higher rates of cardiovascular conditions than their older counterparts [5]. Additionally, data from the Health and Retirement Study indicated that veterans were twice as likely as non-veterans to develop heart disease (RR = 2.00, 95% CI: 1.69–2.35) [3].

Previous research identifies age, male gender, and race (Black or non-Hispanic White) as primary CVD risk factors [2, 7]. Key contributors such as diabetes, hypertension, and high cholesterol account for approximately 75% of CVD risk [8]. A 2014 study found higher blood pressure and HbA1c levels in male veterans compared to female veterans [9]. Moreover, high cholesterol is linked to mortality and cardiovascular events. A retrospective cohort study of veterans with diabetes indicated that those with elevated systolic blood pressure had worse cardiovascular outcomes [10]. Sociodemographic factors like marital status and education may also offer protective effects against CVD [11]. However, limited data exist on independent CVD risk factors in population-based samples of older U.S. veterans. This study aims to address this gap by examining how a wide range of sociodemographic, military, trauma, and clinical variables relate to CVD prevalence.

Veterans facing significant trauma or health morbidities may experience increased disability and CVD mortality risk throughout their lives. Combat experiences have been linked to higher rates of psychiatric conditions [12–14]. For example, combat veterans are over three times more likely than noncombat veterans to screen positive for lifetime post-traumatic stress disorder (PTSD) and exhibit higher rates of PTSD, suicidal behavior, and chronic pain, independent of other factors [11]. Traumatic experiences, including military sexual trauma, have been associated with increased risks of PTSD and depression, both of which are known CVD risk factors [15–19]. A 27-year study involving over 3.3 million deaths found that individuals with a history of suicide attempts had a significantly elevated risk of ischemic heart disease, regardless of depression severity [20]. Older veterans from specific war eras, like the Gulf and Vietnam Wars, also have higher depression rates, a known CVD risk factor [21, 22].

Psychiatric effects of military service may also manifest years later. A prospective study of over 1.5 million men and 94,000 women receiving VA healthcare found that mental illnesses increased CVD risk over five years [23]. A systematic review highlighted a positive association between PTSD and CVD risk factors, such as elevated heart rate and obesity [24]. PTSD developed decades post-service has also been linked to increased cardiovascular mortality [25]. Additionally, PTSD and related disorders may arise from CVD or cardiovascular events [26, 27]. Research indicates that acute CVD events could heighten PTSD risk and recurrence of cardiovascular events [28]. Data from the 2009–2010 and 2011–2012 National Health and Nutrition Examination Surveys showed a higher

prevalence of suicidal ideation in individuals with CVD, particularly among those with prior heart attacks [29]. Lastly, a CDC study found an elevated suicide risk among patients with heart disease and heart failure [30].

Beyond traditional cardiovascular risk factors like hypertension and diabetes, CVD is associated with other physical health issues, including inflammatory conditions such as asthma and arthritis, as well as chronic pain and sleep disorders. Asthma and arthritis are prevalent comorbidities linked to CVD [31–34]. Chronic pain may also result from CVD or related events. For example, a cohort study found that individuals with intense coronary disorders had four times the odds of chronic pain compared to those without [35]. CVD is also linked to chronic kidney disease (CKD), which may be undiagnosed in many CKD patients and can serve as an independent risk factor for CVD [36, 37]. Additionally, CVD is associated with physical disability; a prospective cohort study found that pre-frailty is linked to increased CVD risk [38]. The connection between CVD and other physical health conditions may be partly mediated by psychiatric morbidities. For instance, PTSD can disrupt sleep and contribute to sleep-related issues [39–41]. However, most studies on CVD and physical health conditions have focused on civilians.

In summary, there is a notable lack of data regarding the prevalence, risk factors, and burden of cardiovascular disease among contemporary older U.S. veterans. This study aimed to address this gap by analyzing data from a nationally representative sample of older veterans to achieve the following aims: (1) characterize the lifetime prevalence of CVD among veterans aged 60 and older; (2) examine sociodemographic, military, trauma, and clinical risk factors associated with self-reported CVD; (3) identify mental health conditions related to self-reported CVD; and (4) assess physical health conditions associated with CVD.

## 2. Methods

### 2.1. Participants and procedure

A total of 3,001 older U.S. veterans (age 60+) participated in the 2019–2020 National Health and Resilience in Veterans Study (NHRVS), which surveyed a nationally representative sample of 4,069 veterans from November 2019 to March 2020 (median completion date: November 21, 2019). Participants were recruited from KnowledgePanel, a probability-based online survey panel operated by Ipsos, a multinational survey research company. Participant households were sampled using the U.S. Postal Service Deliver Sequence File (DSF). Participants were given internet access and computers by Ipsos when necessary. The panel is comprised of over 50,000 households that covers approximately 98% of the U.S. adult population. Panel members who endorsed military service (affirmative response to the question: “*Have you ever served on active duty in the U.S. Armed Forces, Military Reserves, or National Guard?*”) were eligible to complete the survey; a total of 7,860 veterans were invited to participate in the study and 4,069 completed it (51.8% participation rate). Of these, a total of 3,001 were age 60 or higher and are the focus of the current study. To permit generalizability of results to the U.S. veteran population, the Ipsos statistical team computed post-stratification weights using the following benchmark distributions of U.S. military veterans from the most contemporaneous (August 2019) Current Veteran Population Supplemental Survey of the U.S. Census Bureau’s American Community Survey: age, gender, race/ethnicity, Census Region, metropolitan status, education, household income, branch of service, and years in service [42]. All participants provided informed consent prior to study participation and the VA Connecticut Health Care System Human Subjects Subcommittee approved this study.

## 2.2. Measures

*Cardiovascular Disease Status.* Response of “yes” to: “Has a doctor or healthcare professional ever told you that you have heart disease; has a doctor or healthcare professional ever told you that you have had a heart attack; has a doctor or healthcare professional ever told you that you have had a stroke?” is indicative of a positive screen for CVD.

*Current PTSD* was assessed using the PTSD Checklist for DSM-5 (PCL-5) [43]; a score  $\geq 33$  was indicative of a positive screen for PTSD.

*Current MDD* was assessed using the Patient Health Questionnaire-2 (PHQ-2) [44]; a score  $\geq 3$  was indicative of a positive screen for MDD.

*Current GAD* was assessed using the Generalized Anxiety Disorder-2 (GAD-2) [45]; a score  $\geq 3$  was indicative of a positive screen for GAD.

*Current AUD* assessed using the Alcohol Use Disorder Identification Test (AUDIT) [46]; a score  $\geq 8$  was indicative of a positive screen for AUD.

*Current DUD* was assessed using the Screen of Drug Use [47]; a response of  $\geq 7$  days is indicative of a positive screen for DUD; a response of 6 or fewer or a response of  $\geq 2$  days to the question “How many days in the past 12 months have you used drugs more than you meant to?” is indicative of a positive screen for DUD.

*Lifetime PTSD* was assessed using the PTSD Checklist for DSM-5 (PCL-5) [43]; a score  $\geq 33$  was indicative of a positive screen for PTSD.

*Lifetime MDD, AUD, and DUD* were assessed using a modified self-report version of the Mini-International Neuropsychiatric Interview for DSM-5 [48]. Standard DSM-5-based algorithms were used to identify positive screens for these disorders.

*Lifetime nicotine use disorder* was assessed using the Fagerström Test for Nicotine Dependence [49]; a score  $\geq 6$  was indicative of a positive screen for NUD.

*Current suicidal ideation* was assessed via endorsement of “several days or more” in response to item 9 (“How often have you been bothered by thoughts that you would be better off dead; and/or thoughts of hurting yourself in some way over the past 2 weeks”) on the Patient Health Questionnaire-9 (PHQ-9) [50].

*Lifetime suicide attempt:* Response of “yes” to the item: “Have you ever tried to kill yourself?”

*Physical health conditions* were assessed using a checklist of 18 different medical conditions assessed by the item: “Has a doctor or healthcare professional ever told you that you have any of the following medical conditions?” (e.g., arthritis, cancer, diabetes, kidney disease).

*Activities of daily living (ADL) disability* were assessed by asking: “At the present time do you need help from another person to do the following (e.g., bathe, walk around home or apartment)?” [51].

*Instrumental activities of daily living (IADL) disability* were assessed by asking: “At the present time do you need help from another person to do the following (e.g., pay bills or manage money)?” [51].

*Adverse childhood experiences and trauma exposures* were assessed via a count of potentially traumatic events on the Life Events Checklist for DSM-5 [52] and score on the Adverse Childhood Experiences Questionnaire [53].

*Gambling use disorder* was assessed using the Brief Problem Gambling Screen [54]. A response of “yes” to one or more of the following questions is indicative of a positive screen for problem gambling: “In the past 12 months would you say you have been preoccupied with gambling; have you needed to gamble with larger amounts of money to get the same feeling of excitement; have you often gambled longer, with more money or more frequently

than you intended to; made attempts to either cut down, control or stop gambling; borrowed money or sold anything to get money to gamble?”

Insomnia was assessed using the Insomnia Severity Index [55]. Score of 15 or higher are indicative of clinical insomnia and scores of 8–14 of subthreshold insomnia.

### 2.3. Data analysis

This secondary data analysis involved an evaluation of the association between self-reported CVD, and military, sociodemographic, clinical, mental health, and physical health variables in a cross-sectional sample of 3,001 older U.S. veterans. Data analyses proceeded in four steps. First, we computed raw, unweighted frequencies, and weighted prevalences of a composite measure of self-reported CVD [56], as well as heart disease, heart attack, and stroke for veterans aged 60+. Second, we conducted independent-samples t-tests and  $\chi^2$  analyses to compare sociodemographic, military, and health risk (HTN, DB, HC) correlates of CVD. We then conducted a series of multivariable binary logistic regression analyses to identify independent correlates of CVD. Sociodemographic, military, and health risk (HTN, DB, HC) correlates that were associated with CVD at the  $p < 0.05$  level in bivariate analyses were included in this model. Odds ratios and 95% confidence intervals were computed to quantify magnitudes of associations between these variables. Third, we conducted a series of multivariable binary logistic regression analyses to examine the relation between CVD, and lifetime and current mental health conditions. To adjust for the effects of potential confounding variables, sociodemographic, military, and health risk (HTN, DB, HC) variables that differed between veterans with and without CVD at the  $p < 0.05$  level in bivariate analyses were entered as covariates in these models; analyses of current psychiatric disorders and suicidality variables additionally adjusted for lifetime mental health conditions. Odds ratios and 95% confidence intervals were computed to quantify magnitudes of associations between CVD and mental health conditions. Fourth, we conducted a series of multivariable binary logistic regression analyses to examine the relation between CVD and lifetime physical health outcomes. These analyses adjusted for sociodemographic, military, and health risk (HTN, DB, HC) variables that differed between veterans with and without CVD at the  $p < 0.05$  level in bivariate analyses, as well as lifetime mental health conditions. Odds ratios and 95% confidence intervals were computed to quantify magnitudes of associations between CVD and physical health conditions. All data analyses were conducted using SAS 9.4 software. All inferential analyses were weighted (e.g., prevalence estimates, regression analyses) and unweighted for reported raw sample sizes.

## 3. Results

The final sample included 3,001 U.S. military veterans aged 60 years and older (mean age = 73.2; SD = 7.9; range = 60–99), the majority of whom were male (96.1%) and White, non-Hispanic (85.2%). Over one-quarter ( $N = 757$ ; 25.2%) of the sample self-reported having been diagnosed with CVD. With regard to specific CVD conditions, 19.2% ( $N = 582$ ) reported having been diagnosed with heart disease, 10.1% ( $N = 290$ ) with a heart attack, and 4.5% ( $N = 138$ ) with a stroke. A total 17.2% ( $N = 523$ ) reported being diagnosed with one of these conditions, 7.5% ( $N = 215$ ) with two conditions, and 0.5% ( $N = 19$ ) with all three conditions.

**Table 1** shows the demographic, military, and clinical characteristics by self-reported CVD status. Relative to veterans without CVD, veterans with CVD were older, and more likely to identify as male and have an annual household income of <\$60,000. They also reported experiencing more traumatic life events, were more likely to screen positive for a lifetime nicotine use disorder and were more likely to report having been diagnosed with high blood pressure, high cholesterol, and diabetes.

Table 1. Demographic, military, and clinical characteristics by self-reported cardiovascular disease status in older U.S. military veterans.

|                                      | Cardiovascular Disease<br>N = 757<br>Weighted 25.2% | No Cardiovascular Disease<br>N = 2,244<br>Weighted 74.8% | Test of difference<br>( $\chi^2$ or t) | p      | Multivariable analysis comparing<br>Cardiovascular Disease to No<br>Cardiovascular Disease |
|--------------------------------------|-----------------------------------------------------|----------------------------------------------------------|----------------------------------------|--------|--------------------------------------------------------------------------------------------|
|                                      | Weighted mean (SD) or n<br>(weighted %)             | Weighted mean (SD) or n<br>(weighted %)                  |                                        |        | OR (95%CI)                                                                                 |
| <b>Demographic Characteristics</b>   |                                                     |                                                          |                                        |        |                                                                                            |
| Age                                  | 75.7 (7.9)                                          | 72.4 (7.8)                                               | 8.99                                   | < .001 | 1.06 (1.05–1.08)***                                                                        |
| Sex                                  |                                                     |                                                          | 5.30                                   | 0.021  |                                                                                            |
| Male                                 | 728 (97.7%)                                         | 2,063 (95.6%)                                            |                                        |        | 1.17 (0.64–2.14)                                                                           |
| Female (ref)                         | 29 (2.3%)                                           | 181 (4.4%)                                               |                                        |        |                                                                                            |
| Race/ethnicity                       |                                                     |                                                          | 0.70                                   | 0.87   | -                                                                                          |
| Non-Hispanic white                   | 664 (85.7%)                                         | 1,933 (85.1%)                                            |                                        |        |                                                                                            |
| Non-Hispanic black                   | 32 (7.6%)                                           | 129 (8.4%)                                               |                                        |        |                                                                                            |
| Hispanic                             | 38 (3.8%)                                           | 120 (3.4%)                                               |                                        |        |                                                                                            |
| Other                                | 23 (2.8%)                                           | 62 (3.1%)                                                |                                        |        |                                                                                            |
| Education                            |                                                     |                                                          | 0.16                                   | 0.69   | -                                                                                          |
| Some college or less                 | 412 (67.4%)                                         | 1,194 (66.5%)                                            |                                        |        |                                                                                            |
| College graduate or more             | 345 (32.6%)                                         | 1,050 (33.5%)                                            |                                        |        |                                                                                            |
| Marital status                       |                                                     |                                                          | 0.82                                   | 0.36   | -                                                                                          |
| Never married/divorced/<br>separated | 220 (27.3%)                                         | 620 (25.4%)                                              |                                        |        |                                                                                            |
| Married/partnered                    | 537 (72.7%)                                         | 1,624 (74.6%)                                            |                                        |        |                                                                                            |
| Annual household income              |                                                     |                                                          | 6.57                                   | 0.010  |                                                                                            |
| ≤ \$60K                              | 360 (49.0%)                                         | 964 (43.0%)                                              |                                        |        |                                                                                            |
| > \$60K (ref)                        | 397 (51.0%)                                         | 1,280 (57.0%)                                            |                                        |        | 0.86 (0.71–1.05)                                                                           |
| <b>Military Characteristics</b>      |                                                     |                                                          |                                        |        |                                                                                            |
| Number of deployments                |                                                     |                                                          | 2.96                                   | 0.23   | -                                                                                          |
| No deployments                       | 500 (69.1%)                                         | 1,550 (70.7%)                                            |                                        |        |                                                                                            |
| One deployment                       | 154 (19.0%)                                         | 460 (19.9%)                                              |                                        |        |                                                                                            |
| Two or more deployments              | 96 (11.9%)                                          | 217 (9.4%)                                               |                                        |        |                                                                                            |
| Enlistment status                    |                                                     |                                                          | 2.72                                   | 0.26   | -                                                                                          |
| Enlisted                             | 553 (70.3%)                                         | 1,606 (72.1%)                                            |                                        |        |                                                                                            |
| Drafted                              | 127 (20.4%)                                         | 352 (17.6%)                                              |                                        |        |                                                                                            |
| Commissioned                         | 76 (9.3%)                                           | 284 (10.4%)                                              |                                        |        |                                                                                            |
| 10+ years in military                | 248 (30.5%)                                         | 719 (30.2%)                                              | 0.01                                   | 0.90   | -                                                                                          |
| <b>Clinical Characteristics</b>      |                                                     |                                                          |                                        |        |                                                                                            |
| Adverse childhood<br>experiences     | 1.2 (1.7)                                           | 1.1 (1.6)                                                | 0.70                                   | 0.48   | -                                                                                          |
| Total traumas                        | 8.6 (7.6)                                           | 7.5 (7.6)                                                | 3.03                                   | 0.002  | 1.03 (1.01–1.04)***                                                                        |
| Lifetime MDD and/or PTSD             | 125 (15.8%)                                         | 322 (15.0%)                                              | 0.19                                   | 0.66   | -                                                                                          |
| Lifetime AUD and/or DUD              | 311 (39.2%)                                         | 858 (39.5%)                                              | 0.02                                   | 0.89   | -                                                                                          |
| Lifetime NUD                         | 171 (23.3%)                                         | 364 (17.7%)                                              | 9.16                                   | 0.002  | 1.39 (1.09–1.77)**                                                                         |
| High blood pressure                  | 541 (72.4%)                                         | 1,263 (58.3%)                                            | 38.00                                  | < .001 | 1.35 (1.08–1.68)**                                                                         |
| High cholesterol                     | 516 (67.5%)                                         | 1,122 (50.0%)                                            | 56.06                                  | < .001 | 1.74 (1.40–2.15)***                                                                        |
| Diabetes                             | 271 (36.8%)                                         | 471 (21.5%)                                              | 55.71                                  | < .001 | 1.86 (1.50–2.29)***                                                                        |

Note. MDD = major depressive disorder; PTSD = posttraumatic stress disorder; AUD = alcohol use disorder; DUD = drug use disorder; NUD = nicotine use disorder.

<https://doi.org/10.1371/journal.pmen.0000192.t001>



In a multivariable analysis, older age, greater number of traumatic life events, lifetime nicotine use disorder, high blood pressure, high cholesterol, and diabetes were independently associated with CVD.

**Table 2** shows the prevalence of mental and physical health conditions of the sample by self-reported CVD status. Relative to veterans without CVD, veterans with CVD were more likely to screen positive for current major depressive, posttraumatic stress, and generalized anxiety disorders, as well as current suicidal ideation. Prevalences of lifetime mental health disorders, and current alcohol and drug use, and gambling disorders did not differ by CVD status. Veterans with CVD were also more likely to report having been diagnosed with arthritis, cancer, chronic pain, kidney disease, sleep disorder, migraine, rheumatoid arthritis, and MCI, dementia, or Alzheimer's disease. They were also more likely to report ADL and/or IADL disability and current insomnia.

In multivariable analyses, CVD was independently associated with increased odds of current major depressive, posttraumatic stress, and generalized anxiety disorders, gambling disorder, and suicidal ideation, as well as arthritis, chronic pain, kidney disease, sleep disorder, migraine, rheumatoid arthritis, MCI, dementia or Alzheimer's disease, any physical disability, and insomnia.

## 4. Discussion

This study provides nationally representative data on the prevalence and overall health burden associated with CVD in older U.S. veterans. Results revealed that over a quarter of older U.S. veterans (25.2%) reported having been diagnosed with composite, self-reported CVD. Given the high mental and physical health burden of CVD observed in this study, these findings underscore the public health significance of CVD in older U.S. veterans.

CVD was strongly associated with a myriad of demographic and clinical characteristics and mental and physical health conditions in our sample of older U.S. veterans, even after adjusting for potential confounding variables. CVD was associated with older age, greater trauma burden, lifetime nicotine use disorder, and CVD risk factors (i.e., high blood pressure and cholesterol, diabetes). In addition, CVD was associated with almost all of the current mental health conditions (e.g., major depressive disorder, PTSD, generalized anxiety disorder) assessed in this study, as well as several potentially debilitating lifetime physical health conditions (e.g., arthritis, chronic pain, sleep disorder) of those considered in this study. Results indicated that study groups did not differ based on several demographic (e.g., race and ethnicity, education, marital status), military (e.g., number of military deployments, enlistment status, years spent in the military), and clinical characteristics (e.g., adverse childhood experiences, lifetime major depressive disorder, and/or PTSD). Although temporality cannot be determined from our cross-sectional study results, these findings are consistent with previous studies, which have shown that CVD is associated with a broad range of demographic and health characteristics among older adults and provide further evidence that this population may particularly benefit from systematic surveillance efforts and timely interventions [57–59].

Greater trauma burden was an independent correlate of CVD in this study. Two pathways may explain this relationship. First, a biological pathway implicating greater traumatic stress and dysregulation of the stress response systems may act as the catalyst for adverse health outcomes such as CVD. For example, traumatic experiences may inundate bodily systems with stress hormones, negatively impact the brain, and increase inflammation, thus leading to adverse health outcomes [60, 61]. Additionally, acute stress induced by traumatic experiences may directly affect heart rate, blood pressure, and influence the onset of cardiac cell death, thus leading to potentially detrimental cardiac events [62]. Second, a behavioral pathway,

**Table 2. Mental and physical health conditions by self-reported cardiovascular disease status in older U.S. military veterans.**

|                                       | Cardiovascular Disease<br>N = 757<br>Weighted 25.2% | No Cardiovascular Disease<br>N = 2,244<br>Weighted 74.8% | Bivariate Test of<br>difference<br>( $\chi^2$ or t) | p      | Multivariable analyses compar-<br>ing Cardiovascular Disease to No<br>Cardiovascular Disease |
|---------------------------------------|-----------------------------------------------------|----------------------------------------------------------|-----------------------------------------------------|--------|----------------------------------------------------------------------------------------------|
|                                       | N (weighted %)                                      | N (weighted %)                                           |                                                     |        | OR (95%CI)                                                                                   |
| <i>Lifetime</i>                       |                                                     |                                                          |                                                     |        |                                                                                              |
| Major depressive disorder             | 91 (10.0%)                                          | 219 (9.0%)                                               | 0.51                                                | 0.47   | 1.20 (0.87–1.67)                                                                             |
| Posttraumatic stress disorder         | 58 (6.9%)                                           | 154 (6.8%)                                               | 0.01                                                | 0.92   | 1.13 (0.75–1.70)                                                                             |
| Alcohol use disorder                  | 296 (37.2%)                                         | 817 (37.8%)                                              | 0.08                                                | 0.77   | 0.96 (0.79–1.17)                                                                             |
| Drug use disorder                     | 67 (8.6%)                                           | 205 (9.7%)                                               | 0.60                                                | 0.44   | 1.08 (0.77–1.52)                                                                             |
| Suicide attempt                       | 14 (1.5%)                                           | 43 (1.5%)                                                | 0.00                                                | 0.96   | 1.19 (0.54–2.63)                                                                             |
| <i>Current</i>                        |                                                     |                                                          |                                                     |        |                                                                                              |
| Major depressive disorder             | 52 (7.2%)                                           | 79 (3.4%)                                                | 15.47                                               | < .001 | 2.27 (1.50–3.45)***                                                                          |
| Posttraumatic stress disorder         | 37 (4.5%)                                           | 64 (2.7%)                                                | 4.01                                                | 0.045  | 1.91 (1.12–3.25)*                                                                            |
| Generalized anxiety disorder          | 34 (4.5%)                                           | 59 (2.7%)                                                | 5.04                                                | 0.025  | 1.75 (1.06–2.89)*                                                                            |
| Alcohol use disorder                  | 58 (7.7%)                                           | 166 (7.7%)                                               | 0.00                                                | 0.98   | 1.24 (0.86–1.77)                                                                             |
| Drug use disorder                     | 52 (7.7%)                                           | 137 (6.2%)                                               | 1.53                                                | 0.22   | 1.65 (1.13–2.42)**                                                                           |
| Gambling disorder                     | 40 (6.2%)                                           | 82 (4.3%)                                                | 3.75                                                | 0.053  | 1.53 (1.01–2.32)*                                                                            |
| Suicidal ideation                     | 57 (6.5%)                                           | 104 (4.2%)                                               | 5.35                                                | 0.021  | 1.54 (1.01–2.35)*                                                                            |
| <i>Lifetime</i>                       |                                                     |                                                          |                                                     |        |                                                                                              |
| Arthritis                             | 367 (47.3%)                                         | 907 (39.8%)                                              | 10.43                                               | 0.001  | 1.27 (1.04–1.53)*                                                                            |
| Asthma, chronic bronchitis, or COPD   | 115 (13.4%)                                         | 264 (11.4%)                                              | 1.83                                                | 0.18   | 1.14 (0.86–1.51)                                                                             |
| Cancer                                | 217 (28.7%)                                         | 551 (24.0%)                                              | 5.25                                                | 0.022  | 1.07 (0.86–1.33)                                                                             |
| Chronic pain                          | 229 (27.6%)                                         | 475 (20.4%)                                              | 13.62                                               | < .001 | 1.48 (1.18–1.85)**                                                                           |
| Liver disease                         | 17 (1.8%)                                           | 40 (1.7%)                                                | 0.05                                                | 0.81   | 1.32 (0.65–2.69)                                                                             |
| Kidney disease                        | 104 (14.4%)                                         | 110 (4.4%)                                               | 69.93                                               | < .001 | 3.43 (2.47–4.77)***                                                                          |
| Sleep disorder                        | 242 (29.3%)                                         | 494 (22.0%)                                              | 13.13                                               | < .001 | 1.51 (1.21–1.88)***                                                                          |
| Migraine                              | 61 (6.6%)                                           | 115 (4.4%)                                               | 4.92                                                | 0.027  | 1.53 (1.02–2.31)*                                                                            |
| Osteoporosis or osteopenia            | 56 (5.8%)                                           | 142 (4.5%)                                               | 1.74                                                | 0.19   | 1.38 (0.90–2.12)                                                                             |
| Rheumatoid arthritis                  | 69 (9.0%)                                           | 121 (5.6%)                                               | 8.13                                                | 0.004  | 1.56 (1.10–2.22)*                                                                            |
| Concussion or traumatic brain injury  | 43 (5.1%)                                           | 104 (4.0%)                                               | 1.33                                                | 0.25   | 1.44 (0.92–2.27)                                                                             |
| MCI, dementia, or Alzheimer's disease | 23 (3.8%)                                           | 34 (1.4%)                                                | 13.32                                               | < .001 | 2.21 (1.23–3.98)**                                                                           |
| Any Physical Disability               | 175 (24.5%)                                         | 254 (12.0%)                                              | 54.71                                               | < .001 | 1.95 (1.54–2.49)***                                                                          |
| ADL disability                        | 61 (8.8%)                                           | 93 (4.4%)                                                | 16.38                                               | < .001 | 1.70 (1.17–2.46)**                                                                           |
| IADL disability                       | 163 (22.7%)                                         | 234 (11.1%)                                              | 49.67                                               | < .001 | 1.92 (1.49–2.46)***                                                                          |
| <i>Insomnia</i>                       |                                                     |                                                          |                                                     |        |                                                                                              |
| Subthreshold Insomnia                 | 205 (26.3%)                                         | 493 (21.7%)                                              |                                                     |        | 1.37 (1.10–1.72)**                                                                           |
| Clinical Insomnia                     | 80 (8.9%)                                           | 133 (5.6%)                                               |                                                     |        | 2.08 (1.44–3.00)***                                                                          |

Note. COPD = chronic obstructive pulmonary disease; MCI = mild cognitive impairment; ADL = activities of daily living; IADL = instrumental activities of daily living. Analyses of lifetime psychiatric variables are adjusted for age, sex, annual household income, and cumulative lifetime trauma burden, which differed by cardiovascular disease status in bivariate analyses (all  $p$ 's<0.05); analyses of current psychiatric disorders, suicide attempt and ideation, and physical health variables are additionally adjusted for lifetime major depressive, posttraumatic stress, alcohol, nicotine, and drug use disorders.

<https://doi.org/10.1371/journal.pmen.0000192.t002>



whereby engaging in risky or poor health behaviors, may link trauma and health outcomes such as CVD [60–62]. Prospective cohort studies of adults with CVD have found that greater trauma exposures may predict unhealthy behaviors such as smoking, nicotine use, tobacco use, or other drug use, unhealthy dietary practices, and physical inactivity, all of which can increase the risk for chronic health conditions—particularly a 38% increased risk for adverse CVD outcomes [63, 64]. These pathways have important clinical relevance for older U.S. veterans, who may experience greater psychological and physical distress due to traumatic exposures during military experience [25–29].

Results of the current study confirm the well-known association between CVD risk factors such as hypertension, high cholesterol, and diabetes, and CVD. They extend this link to older U.S. veterans and underscore the importance of targeting these risk factors as part of primary and secondary prevention and treatment efforts in this population. Previous studies have demonstrated that individuals with underlying health conditions such as diabetes have an increased risk for CVD. For example, a matched case-control study of veterans with diabetes demonstrated that older patients have an increased risk for developing diabetes, with CVD as a complication of the condition in approximately 50% of cases [65]. Given that diabetes may present without symptoms initially, the prevalence could stem from factors such as inadequate diabetes management, delayed diagnosis, limited access to screening, or varying quality of care [65]. Moreover, because diabetes is associated with a higher risk for CVD, it may further be exacerbated by hypertension due to inflammation, insulin resistance, and activation of the immune system [66]. Across all ages and age groups, hypertension has been shown to have an independent association with CVD events such as stroke, myocardial infarction, heart failure, or even sudden death [67]. It is therefore urgent that older veterans with hypertension be screened, monitored, and have access to life-saving care. High cholesterol may also play an influential role in CVD in older veterans and may be attributed to Western lifestyle and dietary patterns. This may result in an increase in plasma accumulation in the arteries, lesions, and plaque, which may cause coronary heart disease and ischemic stroke [68]. Consequently, these clinical characteristics may require greater health care utilization and generate higher health care costs.

Results of this study also suggest that CVD was associated with an elevated likelihood of several current mental health conditions and suicidal ideation. For example, even after conservative adjustment for demographic and trauma characteristics, as well as lifetime mental health conditions, CVD was associated with a 2-fold greater likelihood of screening positive for major depressive disorder (MDD) and a nearly 2-fold greater likelihood for PTSD and generalized anxiety disorder (GAD). In addition, our study found no association between CVD and lifetime mental health conditions, thus suggesting that CVD may lead to the development and diagnosis of current mental health conditions. These results are consistent with previous studies, which have shown that depression, PTSD, and anxiety may be a direct consequence of a cardiac event (including stroke). European meta-analyses, cross-sectional, and observational studies of older U.S. adults ( $\geq 71$  years) have shown that after a clinical stroke diagnosis, 29.3% of patients had some form of anxiety disorder during the first year and 42.2% of patients experienced depression six months after the event [58, 69]. This may be explained by dissatisfaction with the availability of mental health services, physical or cognitive disability resulting from the stroke, or psychological and financial burdens [58, 69].

Moreover, it is important to consider the bidirectional nature of this association and the possible mechanism of cardio-pathogenesis. Anxiety or panic disorder symptoms may exacerbate underlying coronary disease, overlap with coronary heart disease symptoms, and increase creatinine kinase and intraoperative glucose levels [70]. As mentioned above, behavioral factors such as smoking, nicotine use, and avoidance of physical activity may further contribute

to this association [71–73]. Individuals with CVD may develop MDD as a consequence of sedentary behavior, which may occur as a form of maladaptive coping and denial of dealing with CVD; sedentary behavior has been found to be associated with increased risk of CVD and all-cause mortality [74, 75]. The association between CVD and depression may further be explained by the “vascular disease hypothesis,” whereby vascular disease may predispose, precipitate, or perpetuate depressive symptoms in older adults [76]. With regard to PTSD, a recent study revealed that medications may serve as traumatic reminders of previous CVD or stroke events and thus cause aversions toward medication adherence due to feelings of nervousness, anxiousness, and anticipation of future adverse events [77]. In fact, veterans with PTSD have been found to be more likely to report nonadherence to preventative medications [78]. A retrospective cohort study of aging veterans ( $\geq 55$  years) further noted the longitudinal impact of PTSD on incident CVD. Even after adjustment for potential confounders, veterans with late-life PTSD had a 45% increased risk for CVD compared to veterans without late-life PTSD, therefore requiring close monitoring and treatment of these mental health conditions [79].

Results of multivariable analyses further revealed that older veterans who reported having been diagnosed with CVD had more than 50% elevated odds of current gambling disorder and suicidal ideation. The observed link between CVD and gambling disorders aligns with a study that analyzed data on adults aged 55 and older who participated in the National Epidemiologic Survey of Alcohol and Related Conditions (NESARC). In this study, at-risk/problem/pathological gambling (ARPG) was prospectively associated with increased incidence of arteriosclerosis or any heart condition, after controlling for sociodemographic, psychiatric conditions, and substance use covariates [80]. Further, a recent case-control study, the largest of its type conducted to date, found that individuals with a gambling disorder have a higher prevalence of CVD [81]. This association may also be understood in the context of “self-determination” theory (SDT) for gambling motivations. Older individuals may desire autonomy, fulfillment, and increased life satisfaction and thus utilize gambling as a “maladaptive strategy” to address these needs [82]. Additionally, they may view gambling as a recreational outlet or form of entertainment, especially if unable to participate in physically demanding leisure activities due to declining health status [82]. The association between CVD and suicidal ideation in older veterans may be a result of high levels of worry, fear, apprehension about the future, lack of motivation, or ability to concentrate, risk of nonadherence to medications, or physical difficulty participating in rehabilitation programs [83]. This association may further be explained by elevated rates of internalizing psychopathology such as depression, PTSD, and GAD, as well as chronic pain and functional disability observed in veterans with CVD. Indeed, previous studies have found that chronic physical pain associated with CVD may lead to suicidality as a consequence of social isolation, life stress, loss of autonomy and dignity, perceptions of uselessness, increased burden on social networks, and physical impairments [84, 85]. Taken together, these findings highlight the importance of routinely screening and monitoring suicide risk in older veterans with and at risk for CVD.

Relative to veterans who did not report having been diagnosed with CVD, veterans who reported CVD were more likely to report being diagnosed with almost all of the physical health conditions assessed. Multimorbidity has been deemed “endemic” among the older population, particularly those with CVD [86]. More than 70% of adults develop CVD by the age of 70 years old, of which more than 65% develop non-CVD comorbidities [86]. This may be due in part to disease-disease interactions (e.g., chronic kidney disease, hypertension, heart failure), disease-drug interactions (e.g., heart failure and arthritis medications), and drug-drug interactions (e.g., medication for one medical condition weakening another) [86]. The lower observed prevalence of CVD (25%) in the current study may be partly accounted for by lack

of or reduced health care access, reluctance to seek or underutilization of medical care, or mismanagement of physical health conditions such as the ones mentioned above. This may present difficulties in disease management for health care providers and patients and therefore require innovative approaches to medical care. Non-CVD multimorbidity has been found to be associated with increased symptoms and symptom burden than CVD comorbidities [87]. Multimorbidity has a negative effect on both physical and mental health, thus underscoring the importance of timely treatment and comprehensive disease management [88, 89].

Another important physical health issue to consider for older veterans with CVD is insomnia and sleep disturbance. Sleep disturbances have been found to be independently associated with worse CVD outcomes, with epidemiological studies suggesting that sleep disorders such as sleep apnea are causally linked to CVD and stroke [90, 91]. Indeed, a recent systematic review and meta-analysis found that individuals with insomnia were at 1.69 times greater risk for the development of myocardial infarction [92]. Moreover, for patients recovering from a cardiac event, sleep disturbances have been associated with poor medication adherence, worse mental health (e.g., anxiety, depression), and an obstacle to rehabilitation efforts [93].

Limitations of this study must be noted. First, while nationally representative, the sample predominantly consisted of older, male, non-Hispanic white veterans, which may limit the generalizability of findings to more demographically diverse samples of veterans. Relatedly, educational level did not differ by CVD status, which may be related in part to a cohort effect, as the majority of the sample was older and had completed less than a college degree. Second, this study was cross-sectional, which does not allow us to make causal inferences about the association between CVD and other health conditions. Emerging work suggests that MDD is potentially causally linked to CVD and associated risk factors (e.g., HTN), and that this association may be mediated by antidepressant use [94]. Third, CVD was assessed using a self-report measure that inquired about health care professional-diagnosed conditions; given a greater reluctance to seek health care services among older men [95], and thus lower likelihood of receiving a diagnosis of CVD (i.e., heart disease), it is possible that the observed prevalence may reflect an underestimate of the population-based burden of CVD. Further studies are needed to corroborate study findings, particularly longitudinal studies that may help determine temporality or causal linkages between CVD and mental and physical health outcomes.

## 5. Conclusion

This study provides novel insights about the prevalence and health burden of CVD in a contemporary, nationally representative sample of older U.S. veterans. The prevalence of CVD (25.2%) observed in our study sample underscores the importance of monitoring and screening of veterans who may have risk factors for CVD. Our finding that CVD is associated with a broad range of mental and physical health conditions in older U.S. veterans highlights the importance and urgency of recognizing CVD as a priority for prevention and treatment efforts in this population. Results of the current study also underscore the importance of screening, monitoring, and treating the high prevalence of risk factors and other health conditions that are concomitant with self-reported CVD in older U.S. veterans. Further research comprised of more diverse samples that employ longitudinal and mechanistic research designs are needed to examine the prevalence of and bidirectional associations of CVD with demographic, military, and clinical characteristics. Additional research is also needed to evaluate the effectiveness of individual-, societal-, and policy-level interventions and prevention strategies in mitigating the physical, mental, and socioeconomic burdens of CVD and related multimorbidities among older veterans and other at-risk populations.

## Supporting information

**S1 File. Limited dataset used in the current study.**  
(XLSX)

## Acknowledgments

The authors thank the veterans who participated in the National Health and Resilience in Veterans Study, and Judith Lichtman, PhD, MPH, for her feedback on this manuscript. This work, which was Ms. Arechiga's MPH thesis, is dedicated to the memory of her great-grandfather, Augustine G. Martinez, a World War II POW, who passed away in September 2020 due to complications of cardiovascular disease.

## Author contributions

**Conceptualization:** Cailin G. Arechiga.

**Data curation:** Robert H. Pietrzak.

**Formal analysis:** Robert H. Pietrzak.

**Investigation:** Cailin G. Arechiga, Rick Yang, Robert H. Pietrzak.

**Methodology:** Robert H. Pietrzak.

**Project administration:** Robert H. Pietrzak.

**Resources:** Robert H. Pietrzak.

**Software:** Robert H. Pietrzak.

**Supervision:** Robert H. Pietrzak.

**Writing – original draft:** Cailin G. Arechiga, Robert H. Pietrzak.

**Writing – review & editing:** Cailin G. Arechiga, Rick Yang, Robert H. Pietrzak.

## References

1. Martin SS, Aday AW, Almarzooq ZI, et al. 2024 Heart Disease and Stroke Statistics: A Report of US and Global Data From the American Heart Association. 2024 May 7;149(19):e1164. <https://doi.org/10.1161/CIR.0000000000001247>. Erratum in: Circulation. 2024;149(8):e347–e913. <https://doi.org/10.1161/CIR.0000000000001209> PMID: 38264914
2. Krishnamurthi N, Francis J, Fihn SD, Meyer CS, Whooley MA. Leading causes of cardiovascular hospitalization in 8.45 million US veterans. PLoS ONE. 2018;13(3):e0193996. <https://doi.org/10.1371/journal.pone.0193996> PMID: 29566396
3. Assari S. Veterans and risk of heart disease in the United States: A cohort with 20 years of follow up. Int J Prev Med. 2014;5(6):703–709. Accessed November 26, 2020. Available from: /pmc/articles/PMC4085922/?report=abstract. PMID: 25013689
4. Kubzansky LD, Koenen KC, Spiro A, Vokonas PS, Sparrow D. Prospective study of posttraumatic stress disorder symptoms and coronary heart disease in the normative aging study. Arch Gen Psychiatry. 2007;64(1):109–116. <https://doi.org/10.1001/archpsyc.64.1.109> PMID: 17199060
5. Hinojosa R. Veterans' likelihood of reporting cardiovascular disease. J Am Board Fam Med. 2019 Jan-Feb;32(1):50–57. <https://doi.org/10.3122/jabfm.2019.01.180148> PMID: 30610141
6. Spiro A 3rd, Settersten RA, Aldwin CM. Long-term outcomes of military service in aging and the life course: a positive re-envisioning. Gerontologist. 2016 Feb;56(1):5–13. <https://doi.org/10.1093/geront/gnv093> PMID: 26655859
7. Fryar CD, Herrick K, Afful J, Ogden CL. Cardiovascular disease risk factors among male veterans, U.S., 2009–2012. Am J Prev Med. 2016;50(1):101–105. <https://doi.org/10.1016/j.amepre.2015.06.011> PMID: 26232905

8. Sowers JR, Epstein M, Frohlich ED. Diabetes, hypertension, and cardiovascular disease. *Hypertension*. 2001;37(4):1053–1059. <https://doi.org/10.1161/01.HYP.37.4.1053> PMID: [11304502](#)
9. Goldstein KM, Melnyk SD, Zullig LL, et al. Heart matters: Gender and racial differences in cardiovascular disease risk factor control among veterans. *Women's Health Issues*. 2014;24(5):477–483. <https://doi.org/10.1016/j.whi.2014.05.005> PMID: [25213741](#)
10. Raghavan S, Ho YL, Kini V, et al. Association between early hypertension control and cardiovascular disease incidence in veterans with diabetes. *Diabetes Care*. 2019;42(10):1995–2003. <https://doi.org/10.2337/dc19-0686> PMID: [31515207](#)
11. Thomas MM, Harpaz-Rotem I, Tsai J, Southwick SM, Pietrzak RH. Mental and physical health conditions in US combat veterans: Results from the National Health and Resilience in Veterans Study. *Prim Care Companion CNS Disord*. 2017;19(3). <https://doi.org/10.4088/PCC.17m02118> PMID: [28657698](#)
12. Peterson AL, Baker MT, Moore BA, et al. Deployed military medical personnel: Impact of combat and healthcare trauma exposure. *Mil Med*. 2019;184(1–2):E133–E142. <https://doi.org/10.1093/milmed/usy147> PMID: [29931192](#)
13. Hines LA, Sundin J, Rona RJ, Wessely S, Fear NT. Posttraumatic stress disorder post-Iraq and Afghanistan: Prevalence among military subgroups. *Can J Psychiatry*. 2014;59(9):468–479. <https://doi.org/10.1177/070674371405900903> PMID: [25569079](#)
14. Steele M, Germain A, Campbell JS. Mediation and moderation of the relationship between combat experiences and post-traumatic stress symptoms in active duty military personnel. *Mil Med*. 2017;182(5):e1632–e1639. <https://doi.org/10.7205/MILMED-D-16-00169> PMID: [29087905](#)
15. Lutwak N, Dill C. Military sexual trauma increases risk of post-traumatic stress disorder and depression thereby amplifying the possibility of suicidal ideation and cardiovascular disease. *Mil Med*. 2013;178(4):359–361. <https://doi.org/10.7205/MILMED-D-12-00427> PMID: [23707816](#)
16. Norman SB, Haller M, Hamblen JL, Southwick SM, Pietrzak RH. The burden of co-occurring alcohol use disorder and PTSD in U.S. military veterans: Comorbidities, functioning, and suicidality. *Psychol Addict Behav*. 2018;32(2):224–229. <https://doi.org/10.1037/adb0000348> PMID: [29553778](#)
17. Reppermund S, Tsang RSM. The risk relationship between depression and CVD during ageing. In: *Cardiovascular Diseases and Depression: Treatment and Prevention in Psychocardiology*. Springer International Publishing; 2016:23–36. [https://doi.org/10.1007/978-3-319-32480-7\\_3](https://doi.org/10.1007/978-3-319-32480-7_3)
18. Larkin KT, Chantler PD. Stress, depression, and cardiovascular disease. In: *Cardiovascular Implications of Stress and Depression*. Elsevier; 2019:1–12. <https://doi.org/10.1016/B978-0-12-815015-3.00001-5>
19. Rutledge T, Gould HM. Epidemiological evidence linking stress and depression with CVD. In: *Cardiovascular Implications of Stress and Depression*. Elsevier; 2020:15–34. <https://doi.org/10.1016/B978-0-12-815015-3.00002-7>
20. Placido A, Sposito AC. Association between suicide and cardiovascular disease: Time series of 27 years. *Int J Cardiol*. 2009;135(2):261–262. <https://doi.org/10.1016/j.ijcard.2008.03.034> PMID: [18572265](#)
21. Blore JD, Sim MR, Forbes AB, Creamer MC, Kelsall HL. Depression in Gulf War veterans: A systematic review and meta-analysis. *Psychol Med*. 2015;45(8):1565–1580. <https://doi.org/10.1017/S0033291714001913> PMID: [25697603](#)
22. Boakye EA, Buchanan P, Wang J, Stringer L, Geneus C, Scherrer JF. Self-reported lifetime depression and current mental distress among veterans across service eras. *Mil Med*. 2017;182(3):e1691–e1696. <https://doi.org/10.7205/MILMED-D-16-00119> PMID: [28290944](#)
23. Vance MC, Wiitala WL, Sussman JB, Pfeiffer P, Hayward RA. Increased cardiovascular disease risk in veterans with mental illness. *Circ Cardiovasc Qual Outcomes*. 2019;12(10). <https://doi.org/10.1161/CIRCOUTCOMES.119.005563> PMID: [31547692](#)
24. Dyball D, Evans S, Boos CJ, Stevelink SAM, Fear NT. The association between PTSD and cardiovascular disease and its risk factors in male veterans of the Iraq/Afghanistan conflicts: a systematic review. *Int Rev Psychiatry*. 2019;31(1):34–48. <https://doi.org/10.1080/09540261.2019.1580686> PMID: [31041877](#)
25. Ahmadi N, Hajsadeghi F, Mirshkarlo HB, Budoff M, Yehuda R, Ebrahimi R. Post-traumatic stress disorder, coronary atherosclerosis, and mortality. *Am J Cardiol*. 2011;108(1):29–33. <https://doi.org/10.1016/j.amjcard.2011.02.340> PMID: [21530936](#)
26. Meli L, Birk J, Edmondson D, Bonanno GA. Trajectories of posttraumatic stress in patients with confirmed and rule-out acute coronary syndrome. *Gen Hosp Psychiatry*. 2020;62:37–42. <https://doi.org/10.1016/j.genhosppsy.2019.11.006> PMID: [31775067](#)



27. Heart National, Lung, and Blood Institute, National Institutes of Health. Heart disease and depression: A two-way relationship. 2017. Accessed November 27, 2020. Available from: <https://www.nhlbi.nih.gov/news/2017/heart-disease-and-depression-two-way-relationship>
28. Edmondson D, von Känel R. Post-traumatic stress disorder and cardiovascular disease. *Lancet Psychiatry*. 2017;4(4):320–329. [https://doi.org/10.1016/S2215-0366\(16\)30377-7](https://doi.org/10.1016/S2215-0366(16)30377-7) PMID: 28109646
29. Moazzami K, Dolmatova Ev, Feurdean M. Suicidal ideation among adults with cardiovascular disease: The National Health and Nutrition Examination Survey. *Gen Hosp Psychiatry*. 2018;51:5–9. <https://doi.org/10.1016/j.genhosppsych.2017.12.001> PMID: 29268167
30. Grobman B, Kothapalli N, Mansur A, Lu CY. Suicide risk among patients with heart disease and heart failure. *Am J Cardiol*. 2023;203:259–264. <https://doi.org/10.1016/j.amjcard.2023.07.048> PMID: 37516033
31. Wee JH, Park MW, Min C, Byun SH, Park B, Choi HG. Association between asthma and cardiovascular disease. *Eur J Clin Investig*. 2021;51(3):e13396. <https://doi.org/10.1111/eci.13396> PMID: 32888313
32. Kendir C, van den Akker M, Vos R, Metsemakers J. Cardiovascular disease patients have increased risk for comorbidity: A cross-sectional study in the Netherlands. *Eur J Gen Pract*. 2018;24(1):45–50. <https://doi.org/10.1080/13814788.2017.1398318> PMID: 29168400
33. Gottdiener JS. Intersection of 2 epidemics. *JACC Heart Fail*. 2017;5(7):505–506. <https://doi.org/10.1016/j.jchf.2017.05.003> PMID: 28662938
34. Lisspers K, Janson C, Larsson K, et al. Comorbidity and mortality in Swedish asthma patients 2006–2013 - An observational register study (PACEHR). *Eur Respir J*. 2016;48(suppl 60):PA845. <https://doi.org/10.1183/13993003.congress-2016.pa845>
35. van Hecke O, Hocking LJ, Torrance N, et al. Chronic pain, depression and cardiovascular disease linked through a shared genetic predisposition: Analysis of a family-based cohort and twin study. *PLoS ONE*. 2017;12(2):e0170653. <https://doi.org/10.1371/journal.pone.0170653> PMID: 28225781
36. Said S, Hernandez GT. The link between chronic kidney disease and cardiovascular disease. *J Nephrol*. 2014;3(3):99–104. <https://doi.org/10.12860/jnp.2014.19> PMID: 25093157
37. Vallianou NG, Mitesh S, Gkogkou A, Geladari E. Chronic kidney disease and cardiovascular disease: Is there any relationship? *Curr Cardiol Rev*. 2018;15(1):55–63. <https://doi.org/10.2174/1573403x14666180711124825> PMID: 29992892
38. Sergi G, Veronese N, Fontana L, et al. Pre-frailty and risk of cardiovascular disease in elderly men and women: The Pro.V.A. Study. *J Am Coll Cardiol*. 2015;65(10):976–983. <https://doi.org/10.1016/j.jacc.2014.12.040> PMID: 25766943
39. Edmondson D, Cohen BE. Posttraumatic stress disorder and cardiovascular disease. *Prog Cardiovasc Dis*. 2013;55(6):548–556. <https://doi.org/10.1016/j.pcad.2013.03.004> PMID: 23621964
40. Caples SM, Garcia-Touchard A, Somers VK. Sleep-disordered breathing and cardiovascular risk. *Sleep*. 2007;30(3):291–304. <https://doi.org/10.1093/sleep/30.3.291> PMID: 17425225
41. Cappuccio FP, Cooper D, Delia L, Strazzullo P, Miller MA. Sleep duration predicts cardiovascular outcomes: A systematic review and meta-analysis of prospective studies. *Eur Heart J*. 2011;32(12):1484–1492. <https://doi.org/10.1093/eurheartj/ehr007> PMID: 21300732
42. Census Bureau U.S. Current Population Survey, August 2019 Veterans Supplement. Technical Documentation CPS-19. Published 2019. Available from: <https://www2.census.gov/programs-surveys/cps/techdocs/cpsaug19.pdf>
43. Weathers FW, Litz BT, Keane TM, Palmieri PA, Marx BP, Schnurr PP. The PTSD Checklist for DSM-5 (PCL-5). Scale available from the National Center for PTSD at [www.ptsd.va.gov](http://www.ptsd.va.gov)
44. Kroenke K, Spitzer RL, Williams JBW. The Patient Health Questionnaire-2: Validity of a two-item depression screener. *Med Care*. 2003;41(11):1284–1292. <https://doi.org/10.1097/01.MLR.0000093487.78664.3C> PMID: 14583691
45. Kroenke K, Spitzer RL, Williams JBW, Monahan PO, Löwe B. Anxiety disorders in primary care: Prevalence, impairment, comorbidity, and detection. *Ann Intern Med*. 2007;146(5):317–325. <https://doi.org/10.7326/0003-4819-146-5-200703060-00004> PMID: 17339617
46. Babor T. F., Higgins-Biddle J. C., Saunders J. B., & Monteiro M. G. (2001). The Alcohol Use Disorders Identification Test: Guidelines for Use in Primary Care. World Health Organization.
47. Tiet QQ, Leyva YE, Moos RH, Frayne SM, Osterberg L, Smith B. Screen of drug use diagnostic accuracy of a new brief tool for primary care. *JAMA Intern Med*. 2015;175(8):1371–1377. <https://doi.org/10.1001/jamainternmed.2015.2438> PMID: 26075352
48. Sheehan D. Mini Neuropsychiatric Interview English Version 7.0.2 for DSM-5. 2016.



49. Heatherton TF, Kozlowski LT, Frecker RC, Fagerstrom K-O. The Fagerstrom Test for Nicotine Dependence: A revision of the Fagerstrom Tolerance Questionnaire. *Addiction*. 1991;86(9):1119–1127. <https://doi.org/10.1111/j.1360-0443.1991.tb01879.x> PMID: 1932883
50. Kroenke K, Spitzer RL, Williams JBW. The PHQ-9: Validity of a brief depression severity measure. *J Gen Intern Med*. 2001;16(9):606–613. <https://doi.org/10.1046/j.1525-1497.2001.016009606.x> PMID: 11556941
51. Hardy SE, Gill TM. Recovery from disability among community-dwelling older persons. *JAMA*. 2004;291(13):1596–1602. <https://doi.org/10.1001/jama.291.13.1596> PMID: 15069047
52. Weathers FW, Blake DD, Schnurr PP, Kaloupek DG, Marx BP, Keane TM. The Life Events Checklist for DSM-5 (LEC-5). 2013. Instrument available from the National Center for PTSD at [www.ptsd.va.gov](http://www.ptsd.va.gov)
53. Felitti VJ, Anda RF, Nordenberg D, et al. Relationship of childhood abuse and household dysfunction to many of the leading causes of death in adults: The adverse childhood experiences (ACE) study. *Am J Prev Med*. 1998;14(4):245–258. [https://doi.org/10.1016/S0749-3797\(98\)00017-8](https://doi.org/10.1016/S0749-3797(98)00017-8) PMID: 9635069
54. Volberg RA, Williams RJ. Developing a Brief Problem Gambling Screen using clinically validated samples of at-risk, problem and pathological gamblers. Report to the Alberta Gaming Research Institute. Alberta Gaming Research Institute, University of Lethbridge; 200.
55. Bastien CH, Vallières A, Morin CM. Validation of the Insomnia Severity Index as an outcome measure for insomnia research. *Sleep Med*. 2001 Jul;2(4):297–307. [https://doi.org/10.1016/s1389-9457\(00\)00065-4](https://doi.org/10.1016/s1389-9457(00)00065-4) PMID: 11438246
56. World Health Organization. About cardiovascular diseases. Published 2011. Accessed April 17, 2021. Available from: [https://www.who.int/cardiovascular\\_diseases/about\\_cvd/en/](https://www.who.int/cardiovascular_diseases/about_cvd/en/)
57. Arthur HM. Depression, isolation, social support, and cardiovascular disease in older adults. *J Cardio-vasc Nurs*. 2006;21(5 Suppl 1). <https://doi.org/10.1097/00005082-200609001-00002> PMID: 16966925
58. Rafsten L, Danielsson A, Sunnerhagen KS. Anxiety after stroke: A systematic review and meta-analysis. *J Rehabil Med*. 2018;50(9):769–778. <https://doi.org/10.2340/16501977-2384> PMID: 30184240
59. Virani S, Alonso A, Aparicio H, et al. 2021 Heart Disease & Stroke Statistical Update Fact Sheet: Older Americans & Cardiovascular Diseases. *Circulation*. 2021;143(8). <https://doi.org/10.1161/CIR.0000000000000950> PMID: 33501848
60. O'Donovan A, Neylan TC, Metzler T, Cohen BE. Lifetime exposure to traumatic psychological stress is associated with elevated inflammation in the Heart and Soul Study. *Brain Behav Immun*. 2012;26(4):642–649. <https://doi.org/10.1016/j.bbi.2012.02.003> PMID: 22366689
61. Sowder KL, Knight LA, Fishalow J. Trauma exposure and health: A review of outcomes and pathways. *J Aggress Maltreatment Trauma*. 2018;27(10):1041–1059. <https://doi.org/10.1080/10926771.2017.1422841>
62. Lagrauw HM, Kuiper J, Bot I. Acute and chronic psychological stress as risk factors for cardiovascular disease: Insights gained from epidemiological, clinical and experimental studies. *Brain Behav Immun*. 2015;50:18–30. <https://doi.org/10.1016/j.bbi.2015.08.007> PMID: 26256574
63. Hendrickson CM, Neylan TC, Na B, Regan M, Zhang Q, Cohen BE. Lifetime trauma exposure and prospective cardiovascular events and all-cause mortality: Findings from the Heart and Soul Study. *Psychosom Med*. 2013;75(9):849–855. <https://doi.org/10.1097/PSY.0b013e3182a88846> PMID: 24149074
64. Waldrop AE, Cohen BE. Trauma exposure predicts alcohol, nicotine, and drug problems beyond the contribution of PTSD and depression in patients with cardiovascular disease: Data from the Heart and Soul Study. *Am J Addict*. 2014;23(1):53–61. <https://doi.org/10.1111/j.1521-0391.2013.12053.x> PMID: 24313242
65. Olson DE, Zhu M, Long Q, et al. Increased cardiovascular disease, resource use, and costs before the clinical diagnosis of diabetes in veterans in the southeastern U.S. *J Gen Intern Med*. 2015;30(6):749–757. <https://doi.org/10.1007/s11606-014-3075-7> PMID: 25608739
66. Petrie JR, Guzik TJ, Touyz RM. Diabetes, hypertension, and cardiovascular disease: Clinical insights and vascular mechanisms. *Can J Cardiol*. 2018;34(5):575–584. <https://doi.org/10.1016/j.cjca.2017.12.005> PMID: 29459239
67. Kjeldsen SE. Hypertension and cardiovascular risk: General aspects. *Pharmacol Res*. 2018;129:95–99. <https://doi.org/10.1016/j.phrs.2017.11.003> PMID: 29127059
68. Félix-Redondo FJ, Grau M, Fernández-Bergés D. Cholesterol and cardiovascular disease in the elderly. Facts and gaps. *Aging Dis*. 2013;4(3):154–169. Accessed March 11, 2021. Available from: [www.census.gov](http://www.census.gov)

69. López-Espuela F, Roncero-Martín R, Canal-Macías M de la L, et al. Depressed mood after stroke: Predictive factors at six months follow-up. *Int J Environ Res Public Health*. 2020;17(24):1–11. <https://doi.org/10.3390/ijerph17249542> PMID: 33419273
70. Tully PJ, Turnbull DA, Beltrame J, et al. Panic disorder and incident coronary heart disease: A systematic review and meta-regression in 1,131,612 persons and 58,111 cardiac events. *Psychol Med*. 2015;45(14):2909–2920. <https://doi.org/10.1017/S0033291715000963> PMID: 26027689
71. Hoertel N, le Strat Y, de Maricourt P, Limosin F, Dubertret C. Are subjects in treatment trials of panic disorder representative of patients in routine clinical practice? Results from a national sample. *J Affect Disord*. 2013;146(3):383–389. <https://doi.org/10.1016/j.jad.2012.09.023> PMID: 23084184
72. Isensee B, Wittchen HU, Stein MB, Höfler M, Lieb R. Smoking increases the risk of panic: Findings from a prospective community study. *Arch Gen Psychiatry*. 2003;60(7):692–700. <https://doi.org/10.1001/archpsyc.60.7.692> PMID: 12860773
73. Muotri RW, Bernik MA. Panic disorder and exercise avoidance. *Rev Bras Psiquiatr*. 2014;36(1):68–75. <https://doi.org/10.1590/1516-4446-2012-1012> PMID: 24604463
74. Biswas A, Oh PI, Faulkner GE, et al. Sedentary time and its association with risk for disease incidence, mortality, and hospitalization in adults. *Ann Intern Med*. 2015;162(2):123. <https://doi.org/10.7326/M14-1651> PMID: 25599350
75. Schuch F, Vancampfort D, Firth J, et al. Physical activity and sedentary behavior in people with major depressive disorder: A systematic review and meta-analysis. *J Affect Disord*. 2017;210:139–150. <https://doi.org/10.1016/j.jad.2016.10.050> PMID: 28033521
76. Alexopoulos GS, Bruce ML, Silbersweig D, Kalayam B, Stern E. Vascular depression: A new view of late-onset depression. *Dialogues Clin Neurosci*. 1999;1(2):68–80. <https://doi.org/10.31887/DCNS.1999.1.2/galexopoulos> PMID: 22033775
77. Liyanage-Don N, Birk J, Cornelius T, et al. Medications as traumatic reminders in patients with stroke/transient ischemic attack-induced posttraumatic stress disorder. *Stroke*. 2021;52(1):321–324. <https://doi.org/10.1161/STROKEAHA.120.031109> PMID: 33272128
78. Kronish IM, Edmondson D, Li Y, Cohen BE. Post-traumatic stress disorder and medication adherence: Results from the Mind Your Heart Study. *J Psychiatr Res*. 2012;46:1595–1599. <https://doi.org/10.1016/j.jpsychires.2012.06.011> PMID: 22809686
79. Beristianos MH, Yaffe K, Cohen B, Byers AL. PTSD and risk of incident cardiovascular disease in aging veterans. *Am J Geriatr Psychiatry*. 2016;24(3):192–200. <https://doi.org/10.1016/j.jagp.2014.12.003> PMID: 25555625
80. Pilver CE, Potenza MN. Increased incidence of cardiovascular conditions among older adults with pathological gambling features in a prospective study. *J Addict Med*. 2013;7(6):387–393. <https://doi.org/10.1097/ADM.0b013e31829e9b36> PMID: 24104190
81. Abdul Rahim Y, Fernandez-Aranda F, Jimenez-Murcia S, Håkansson A. A nationwide case-control study on cardiovascular and respiratory-related disorders in patients with gambling disorder in Sweden. *Public Health*. 2023;224:45–50. <https://doi.org/10.1016/j.puhe.2023.08.018> PMID: 37716175
82. Martin F, Lichtenberg PA, Templin TN. A longitudinal study: Casino gambling attitudes, motivations, and gambling patterns among urban elders. *J Gambl Stud*. 2011;27(2):287–297. <https://doi.org/10.1007/s10899-010-9202-4> PMID: 20549548
83. Nascimento ER, Maia ACO, Soares-Filho G, Nardi AE, Cardoso A. Predictors of suicidal ideation in coronary artery disease. *Compr Psychiatry*. 2015;57:16–20. <https://doi.org/10.1016/j.comppsy.2014.10.017> PMID: 25464838
84. Daray FM, Goldmann E, Gutierrez L, et al. Suicidal ideation is associated with cardiovascular disease in a large, urban cohort of adults in the Southern Cone of Latin America. *Gen Hosp Psychiatry*. 2019;57:34–40. <https://doi.org/10.1016/j.genhosppsych.2018.12.006> PMID: 30710890
85. Kye SY, Park K. Suicidal ideation and suicidal attempts among adults with chronic diseases: A cross-sectional study. *Compr Psychiatry*. 2017;73:160–167. <https://doi.org/10.1016/j.comppsy.2016.12.001> PMID: 27992846
86. Forman DE, Maurer MS, Boyd C, et al. Multimorbidity in older adults with cardiovascular disease. *J Am Coll Cardiol*. 2018;71(19):2149–2161. <https://doi.org/10.1016/j.jacc.2018.03.022> PMID: 29747836
87. Rahimi K, Lam CSP, Steinhilb S. Cardiovascular disease and multimorbidity: A call for interdisciplinary research and personalized cardiovascular care. *PLoS Med*. 2018;15(3). <https://doi.org/10.1371/journal.pmed.1002545> PMID: 29584731
88. Dunlay SM, Chamberlain AM. Multimorbidity in older patients with cardiovascular disease. *Curr Cardiovasc Risk Rep*. 2016;10(3). <https://doi.org/10.1007/s12170-016-0491-8> PMID: 27274775

89. Shad B, Ashouri A, Hasandokht T, et al. Effect of multimorbidity on quality of life in adults with cardiovascular disease: A cross-sectional study. *Health Qual Life Outcomes*. 2017;15(1):240. <https://doi.org/10.1186/s12955-017-0820-8> PMID: [29221456](https://pubmed.ncbi.nlm.nih.gov/29221456/)
90. Drager LF, McEvoy RD, Barbe F, Lorenzi-Filho G, Redline S. Sleep apnea and cardiovascular disease: Lessons from recent trials and need for team science. *Circulation*. 2017;136(19):1840–1850. <https://doi.org/10.1161/CIRCULATIONAHA.117.029400> PMID: [29109195](https://pubmed.ncbi.nlm.nih.gov/29109195/)
91. Dredla BK, Castillo PR. Cardiovascular consequences of obstructive sleep apnea. *Curr Cardiol Rep*. 2019;21(11):1–7. <https://doi.org/10.1007/s11886-019-1228-3> PMID: [31707504](https://pubmed.ncbi.nlm.nih.gov/31707504/)
92. Dean YE, Shebl MA, Rouzan SS, et al. Association between insomnia and the incidence of myocardial infarction: A systematic review and meta-analysis. *Clin Cardiol*. 2023;46(4):376–385. <https://doi.org/10.1002/clc.23984> PMID: [36841256](https://pubmed.ncbi.nlm.nih.gov/36841256/)
93. Gallagher J, Parenti G, Doyle F. Psychological aspects of cardiac care and rehabilitation: Time to wake up to sleep? *Curr Cardiol Rep*. 2015;17(12). <https://doi.org/10.1007/s11886-015-0667-8> PMID: [26482754](https://pubmed.ncbi.nlm.nih.gov/26482754/)
94. Cao H, Baranova A, Zhao Q, Zhang F. Bidirectional associations between mental disorders, antidepressants and cardiovascular disease. *BMJ Ment Health*. 2024;27(1). <https://doi.org/10.1136/bmj-ment-2023-300975> PMID: [38490691](https://pubmed.ncbi.nlm.nih.gov/38490691/)
95. Green CA, Pope CR. Gender, psychosocial factors and the use of medical services: A longitudinal analysis. *Soc Sci Med*. 1999;48(10):1363–1372. [https://doi.org/10.1016/s0277-9536\(98\)00440-7](https://doi.org/10.1016/s0277-9536(98)00440-7) PMID: [10369437](https://pubmed.ncbi.nlm.nih.gov/10369437/)
